# Supplementary material for: Patients’ Needs Concerning Patient Education in Axial Spondyloarthritis: A Qualitative Study
Source: PubMed Central journal article supplement — Rheumatol Ther. 2023 Jul 31;10(5):1349–68. doi: 10.1007/s40744-023-00585-7 (PMC10469151; doi:10.1007/s40744-023-00585-7), 2023-07-31
Supplement: 40744_2023_585_MOESM1_ESM.pdf [file 40744_2023_585_MOESM1_ESM.pdf]

# Supplementary Materials

## Patients' Needs Concerning Patient Education in Axial Spondyloarthritis: A Qualitative Study

Yvonne M. van der Kraan, BSc<sup>1</sup>, Davy Paap, PhD<sup>1,2</sup>, Niels Lennips, BSc<sup>1</sup>, Else C.A. Veenstra, BSc<sup>1</sup>, Freke R. Wink, MD<sup>3</sup>, Stan C. Keskamp, MD<sup>1</sup>, Anneke Spoorenberg, MD/PhD<sup>1</sup>

### Affiliations:

<sup>1</sup>Department of Rheumatology and Clinical Immunology, University Medical Center

Groningen, University of Groningen, Groningen, NL

<sup>2</sup>School of health, Department of physiotherapy, Saxion University of Applied Sciences,

Enschede, NL

<sup>3</sup>Department of Rheumatology, Medical Center Leeuwarden, Leeuwarden, NL

### Corresponding author:

University Medical Center Groningen

Department of Rheumatology and Clinical Immunology

T.a.v. Y.M. van der Kraan

P.O. box 30 001  
9700 RB Groningen

The Netherlands

E-mail address: [y.m.van.der.kraan@umcg.nl](mailto:y.m.van.der.kraan@umcg.nl)

## **Interview Guide:**

### **Opening**

Introduction, small talk and explanation of the interview procedure.

#### **1. Could you describe how you ended up at the rheumatology department in the UMCG?**

PROBE: symptoms

- Age
- Which symptoms did you experience?
- How did they influence your daily life?
- How did you cope with that?

PROBE: diagnosis

- How did you receive the diagnosis?
- What kind of patient education did you get at the moment of the diagnosis?
- What feelings did you experience when receiving the diagnosis?
- Were you alone or together with someone when you received patient education?
- Was the patient education sufficient?
- Why was it (in)sufficient?

#### **2. Could you tell me what kind of patient education you received during your disease process?**

PROBE: attraction

- Have you searched for information yourself?
  - When did you do this?
  - Are you now searching in a different way than you did before?

- Do you always understand the information and patient education that you get?
- Does the patient education match your needs?
- Which topics do you find important and would you prefer to see in patient education?
- What would you like to learn from patient education?

PROBE: fashion

- You have just told me that you have received patient education from various healthcare providers, can you tell me if you received any other form of patient education since you were diagnosed? (patient association, flyer)
- Was this offered to you or did you search for it yourself?
- What form of patient education do you prefer? And why?
- Is there a form of patient education that you did not receive but that you would still like to receive? And why?
- Are you affiliated with a patient association?
- Would you like to tell me more about it?
  - Ambiance
  - Purpose
  - Appointments
  - Contact

PROBE: moment

- In your opinion, at which moment was the patient education most useful? And why?
- Do you still prefer to receive patient education?
  - About what?

### **3. How do you experience the contact with the healthcare providers?**

PROBE: patient-healthcare provider relationship

- Who is/was involved in your disease process?
- What is/was their function?
- How did you experience the contact with them?
- Do you feel that you can discuss everything with your healthcare provider?
- Do you feel that you have an influence on the decisions that are made regarding your disease process?
  - Can you explain why you feel you (do not) have an influence?
- Have these healthcare providers also provided patient education on your disease?

### **4. If you were a healthcare provider, what kind of patient education would you offer to new patients with axSpA?**

*Suggestions:*

- *Face-to-face contact with a healthcare provider*
- *group sessions / patient day*
- *videos*
- *writing / folder*

### **Closing statement:**

Is there anything you would like to add?

What did you think about the interview?

Do you have any more questions?

## COREQ (COnsolidated criteria for REporting Qualitative research) Checklist

A checklist of items that should be included in reports of qualitative research. You must report the page number in your manuscript where you consider each of the items listed in this checklist. If you have not included this information, either revise your manuscript accordingly before submitting or note N/A.

| Topic                                          | Item No. | Guide Questions/Description                                                                                                                              | Reported on Page No. |
|------------------------------------------------|----------|----------------------------------------------------------------------------------------------------------------------------------------------------------|----------------------|
| <b>Domain 1: Research team and reflexivity</b> |          |                                                                                                                                                          |                      |
| <i>Personal characteristics</i>                |          |                                                                                                                                                          |                      |
| Interviewer/facilitator                        | 1        | Which author/s conducted the interview or focus group?                                                                                                   | 7                    |
| Credentials                                    | 2        | What were the researcher's credentials? E.g. PhD, MD                                                                                                     | 1                    |
| Occupation                                     | 3        | What was their occupation at the time of the study?                                                                                                      | 1                    |
| Gender                                         | 4        | Was the researcher male or female?                                                                                                                       | N/A                  |
| Experience and training                        | 5        | What experience or training did the researcher have?                                                                                                     | 7                    |
| <i>Relationship with participants</i>          |          |                                                                                                                                                          |                      |
| Relationship established                       | 6        | Was a relationship established prior to study commencement?                                                                                              | 7                    |
| Participant knowledge of the interviewer       | 7        | What did the participants know about the researcher? e.g. personal goals, reasons for doing the research                                                 | 7                    |
| Interviewer characteristics                    | 8        | What characteristics were reported about the interviewer/facilitator? e.g. Bias, assumptions, reasons and interests in the research topic                | 7                    |
| <b>Domain 2: Study design</b>                  |          |                                                                                                                                                          |                      |
| <i>Theoretical framework</i>                   |          |                                                                                                                                                          |                      |
| Methodological orientation and Theory          | 9        | What methodological orientation was stated to underpin the study? e.g. grounded theory, discourse analysis, ethnography, phenomenology, content analysis | 6                    |
| <i>Participant selection</i>                   |          |                                                                                                                                                          |                      |
| Sampling                                       | 10       | How were participants selected? e.g. purposive, convenience, consecutive, snowball                                                                       | 7                    |
| Method of approach                             | 11       | How were participants approached? e.g. face-to-face, telephone, mail, email                                                                              | 7                    |
| Sample size                                    | 12       | How many participants were in the study?                                                                                                                 | 9                    |
| Non-participation                              | 13       | How many people refused to participate or dropped out? Reasons?                                                                                          | 9                    |
| <i>Setting</i>                                 |          |                                                                                                                                                          |                      |
| Setting of data collection                     | 14       | Where was the data collected? e.g. home, clinic, workplace                                                                                               | 9                    |
| Presence of non-participants                   | 15       | Was anyone else present besides the participants and researchers?                                                                                        | 9                    |
| Description of sample                          | 16       | What are the important characteristics of the sample? e.g. demographic data, date                                                                        | 9,10                 |
| <i>Data collection</i>                         |          |                                                                                                                                                          |                      |
| Interview guide                                | 17       | Were questions, prompts, guides provided by the authors? Was it pilot tested?                                                                            | 8                    |
| Repeat interviews                              | 18       | Were repeat interviews carried out? If yes, how many?                                                                                                    | N/A                  |
| Audio/visual recording                         | 19       | Did the research use audio or visual recording to collect the data?                                                                                      | 8                    |
| Field notes                                    | 20       | Were field notes made during and/or after the interview or focus group?                                                                                  | 9                    |
| Duration                                       | 21       | What was the duration of the interviews or focus group?                                                                                                  | 8                    |
| Data saturation                                | 22       | Was data saturation discussed?                                                                                                                           | 8,10                 |
| Transcripts returned                           | 23       | Were transcripts returned to participants for comment and/or                                                                                             | 9                    |

| Topic                                  | Item No. | Guide Questions/Description                                                                                                        | Reported on Page No. |
|----------------------------------------|----------|------------------------------------------------------------------------------------------------------------------------------------|----------------------|
|                                        |          | correction?                                                                                                                        |                      |
| <b>Domain 3: analysis and findings</b> |          |                                                                                                                                    |                      |
| <i>Data analysis</i>                   |          |                                                                                                                                    |                      |
| Number of data coders                  | 24       | How many data coders coded the data?                                                                                               | 8                    |
| Description of the coding tree         | 25       | Did authors provide a description of the coding tree?                                                                              | 8,9                  |
| Derivation of themes                   | 26       | Were themes identified in advance or derived from the data?                                                                        | 8,9                  |
| Software                               | 27       | What software, if applicable, was used to manage the data?                                                                         | 8                    |
| Participant checking                   | 28       | Did participants provide feedback on the findings?                                                                                 | 8                    |
| <i>Reporting</i>                       |          |                                                                                                                                    |                      |
| Quotations presented                   | 29       | Were participant quotations presented to illustrate the themes/findings?<br>Was each quotation identified? e.g. participant number | 11                   |
| Data and findings consistent           | 30       | Was there consistency between the data presented and the findings?                                                                 | 9-15                 |
| Clarity of major themes                | 31       | Were major themes clearly presented in the findings?                                                                               | 9-15                 |
| Clarity of minor themes                | 32       | Is there a description of diverse cases or discussion of minor themes?                                                             | 9-15                 |

Developed from: Tong A, Sainsbury P, Craig J. Consolidated criteria for reporting qualitative research (COREQ): a 32-item checklist for interviews and focus groups. *International Journal for Quality in Health Care*. 2007. Volume 19, Number 6: pp. 349 – 357

**Once you have completed this checklist, please save a copy and upload it as part of your submission. DO NOT include this checklist as part of the main manuscript document. It must be uploaded as a separate file.**
